# Supplementary material
Source: PubMed Central journal article supplement (PMC6324445)

## Supplementary Online Content

Tartof SY, Kuntz JL, Chen LH, et al. Development and assessment of risk scores for carbapenem and extensive  $\beta$ -lactam resistance among adult hospitalized patients with *Pseudomonas aeruginosa* infection. *JAMA Netw Open*. 2018;1(6):e183927. doi:10.1001/jamanetworkopen.2018.3927

**eTable 1.** Definition of Covariates

**eTable 2.** Comparison of Training and Validation Data Sets for Patients with CR and Non-CR *Pseudomonas aeruginosa* Infections

**eTable 3.** Comparison of Training and Validation Data Sets for Patients With EBR and Non-EBR *Pseudomonas aeruginosa* Infections

**eTable 4.** Selected Characteristics of Patients With CR, Non-CR, EBR, and Non-EBR *Pseudomonas aeruginosa* Infections

**eTable 5.** Antibiotic Susceptibility Results, Stratified by CR and EBR Status

**eTable 6.** Comparison of Observed and Point-Based Predicted Risk by Quintile for CRe and EBR *Pseudomonas aeruginosa* (n = 5668)

**eTable 7.** Sensitivity Analyses Including only the First Infection per Patient

**eFigure 1.** Comparison of Model Performance by Variable Selection Approach

**eFigure 2.** Flowchart of Study Population Selection

**eFigure 3.** Estimated Risk of Carbapenem-Resistant (CR) and Carbapenem, Ceftazidime, and Piperacillin-Tazobactam–Resistant (EBR) *Pseudomonas aeruginosa* Infection by Point Total

**eFigure 4.** Models in Training and Validation Data Sets

This supplementary material has been provided by the authors to give readers additional information about their work.

**eTable 1. Definition of Covariates**

| <b>Covariate</b>                                                                        | <b>Definition</b>                                                                                                                                                                                                        |
|-----------------------------------------------------------------------------------------|--------------------------------------------------------------------------------------------------------------------------------------------------------------------------------------------------------------------------|
| <b>Demographic</b>                                                                      |                                                                                                                                                                                                                          |
| Sex                                                                                     | Male, Female                                                                                                                                                                                                             |
| Age at index culture date in years                                                      | ≥ 18 years at index culture date                                                                                                                                                                                         |
| Race/Ethnicity                                                                          | White non-Hispanic, Black non-Hispanic, Hispanic, Asian/Hawaiian/Pacific Islander, American Indian or Alaska Native/Multiple/Other/Unknown                                                                               |
| <b>Characteristics of Index Admission</b>                                               |                                                                                                                                                                                                                          |
| Specimen Site of Index Infection                                                        |                                                                                                                                                                                                                          |
| Other                                                                                   | Specimen site of index infection including blood, respiratory, GU, GI, skin/bone and other sites                                                                                                                         |
| Respiratory                                                                             | Respiratory specimen site of index infection only                                                                                                                                                                        |
| Source of Infection                                                                     |                                                                                                                                                                                                                          |
| Present at hospital admission                                                           | Index culture date ≤2 days (48 hours) of admission                                                                                                                                                                       |
| Hospital-onset                                                                          | Index culture date >2 days (48 hours) after admission                                                                                                                                                                    |
| Co-Infecting Pathogen                                                                   | Other pathogens ( <b>NOT</b> limited to only gram negative) that were present in the same sample as Pseudomonas                                                                                                          |
| ICU Prior to Index Culture                                                              | Intensive Care Unit admission during hospitalization prior to index culture date                                                                                                                                         |
| Skilled Nurse Facilities Transfer                                                       | Patient was transferred from a skilled nursing facility or long-term care facility (not including hospice care)                                                                                                          |
| <b>Invasive Devices and/or Procedures (between admission and prior to culture date)</b> | Insertion of the following device and/or procedure between admission and prior to index date: Endotracheal tube, tracheostomy, hemodialysis, gastric or jejunal feeding tube, indwelling urinary catheter, CVC/Port/PICC |
| <b>Surgery prior to Index Culture</b>                                                   | Any surgery (in operation room) prior to index date                                                                                                                                                                      |
| <b>LOS from admission to index culture</b>                                              | Length of stay from admission to index date: 0-3, 4-10, 11+ days                                                                                                                                                         |
| <b>ICU LOS prior to index culture</b>                                                   | Length of stay in the intensive care unit prior to index date: 0-3, 4-10, 11+ days                                                                                                                                       |
| <b>Pseudomonas 30 days prior to index admission</b>                                     | Included both inpatient and outpatient settings                                                                                                                                                                          |
| No Prior Pseudomonas (ref)                                                              | No prior Pseudomonas infection (used as a reference point)                                                                                                                                                               |
| Carbapenem-Susceptible Pseudomonas                                                      | Prior Carbapenem-Susceptible Pseudomonas culture 30 days prior to index date                                                                                                                                             |
| Carbapenem-Resistant Pseudomonas                                                        | Prior Carbapenem-Resistant Pseudomonas culture 30 days prior to index date                                                                                                                                               |

| <b>Covariate</b>                                                | <b>Definition</b>                                                                                                                                                                                                                                              |
|-----------------------------------------------------------------|----------------------------------------------------------------------------------------------------------------------------------------------------------------------------------------------------------------------------------------------------------------|
| <b>Healthcare Exposure in 6 months Prior to Index Admission</b> |                                                                                                                                                                                                                                                                |
| Previous hospitalization                                        | Previous hospitalization ≤6 months prior to index date                                                                                                                                                                                                         |
| Number of days hospitalized                                     | Number of days the patient was hospitalized in the ≤6 months prior to index date: 0-3, 4-10, 11+ days                                                                                                                                                          |
| Previous ICU Admission                                          | Prior intensive care unit admission ≤6 months prior to index date                                                                                                                                                                                              |
| Dialysis                                                        | History of active dialysis ≤6 months prior to index date                                                                                                                                                                                                       |
| <b>Comorbidity 6 months prior to index date</b>                 | Comorbidity ICD codes from both inpatient and/or outpatient settings                                                                                                                                                                                           |
| Myocardial infarction                                           | <b>Enhanced ICD-9-CM:</b> 410.x, 412.x<br><b>ICD-10:</b> I21.x, I22.x, I25.2                                                                                                                                                                                   |
| Congestive heart failure                                        | <b>Enhanced ICD-9-CM:</b> 398.91, 402.01, 402.11, 402.91, 404.01, 404.03, 404.11, 404.13, 404.91, 404.93, 425.4-425.9, 428.x<br><b>ICD-10:</b> I09.9, I11.0, I13.0, I13.2, I25.5, I42.0, I42.5-I42.9, I43.x, I50.x, P29.0                                      |
| Peripheral vascular disease                                     | <b>Enhanced ICD-9-CM:</b> 093.0, 437.3, 440.x, 441.x, 443.1-443.9, 447.1, 557.1, 557.9, V43.4<br><b>ICD-10:</b> I70.x, I71.x, I73.1, I73.8, I73.9, I77.1, I79.0, I79.2, K55.1, K55.8, K55.9, Z95.8, Z95.9                                                      |
| Cerebrovascular disease                                         | <b>Enhanced ICD-9-CM:</b> 362.34, 430.x-438.x<br><b>ICD-10:</b> G45.x, G46.x, H34.0, I60.x-I69.x                                                                                                                                                               |
| Dementia                                                        | <b>Enhanced ICD-9-CM:</b> 290.x, 294.1, 331.2<br><b>ICD-10:</b> F00.x-F03.x, F05.1, G30.x, G31.1                                                                                                                                                               |
| Chronic pulmonary disease                                       | <b>Enhanced ICD-9-CM:</b> 416.8, 416.9, 490.x-505.x, 506.4, 508.1, 508.8<br><b>ICD-10:</b> I27.8, I27.9, J40.x-J47.x, J60.x-J67.x, J68.4, J70.1, J70.3                                                                                                         |
| Peptic ulcer disease                                            | <b>Enhanced ICD-9-CM:</b> 531.x-534.x<br><b>ICD-10:</b> K25.x-K28.x                                                                                                                                                                                            |
| Mild liver disease                                              | <b>Enhanced ICD-9-CM:</b> 070.22, 070.23, 070.32, 070.33, 070.44, 070.54, 070.6, 070.9, 570.x, 571.x, 573.3, 573.4, 573.8, 573.9, V42.7<br><b>ICD-10:</b> B18.x, K70.0-K70.3, K70.9, K71.3-K71.5, K71.7, K73.x, K74.x, K76.0, K76.2-K76.4, K76.8, K76.9, Z94.4 |
| Diabetes (with and without chronic complication)                | <b>Enhanced ICD-9-CM:</b> 250.0-250.9<br><b>ICD-10:</b> E10.0-E10.9, E11.0-E11.9, E12.0-E12.9, E13.0-E13.9, E14.0- E14.9                                                                                                                                       |
| Hemiplegia or paraplegia                                        | <b>Enhanced ICD-9-CM:</b> 334.1, 342.x, 343.x, 344.0-344.6, 344.9<br><b>ICD-10:</b> G04.1, G11.4, G80.1, G80.2, G81.x, G82.x, G83.0-G83.4, G83.9                                                                                                               |

| <b>Covariate</b>                                                           | <b>Definition</b>                                                                                                                                                                                                                                                            |
|----------------------------------------------------------------------------|------------------------------------------------------------------------------------------------------------------------------------------------------------------------------------------------------------------------------------------------------------------------------|
| Renal Disease                                                              | <b>Enhanced ICD-9-CM:</b> 403.01, 403.11, 403.91, 404.02, 404.03, 404.12, 404.13, 404.92, 404.93, 582.x, 583.0-583.7, 585.x, 586.x, 588.0, V42.0, V45.1, V56.x<br><b>ICD-10:</b> I12.0, I13.1, N03.2-N03.7, N05.2-N05.7, N18.x, N19.x, N25.0, Z49.0-Z49.2, Z94.0, Z99.2      |
| Malignancy, including leukemia and lymphoma (≠ malignant neoplasm of skin) | <b>Enhanced ICD-9-CM:</b> 140.x-172.x, 174.x-195.8, 200.x-208.x, 238.6<br><b>ICD-10:</b> C00.x-C26.x, C30.x-C34.x, C37.x-C41.x, C43.x, C45.x-C58.x, C60.x-C76.x, C81.x-C85.x, C88.x, C90.x-C97.x                                                                             |
| Moderate or severe liver disease                                           | <b>Enhanced ICD-9-CM:</b> 456.0-456.2, 572.2-572.8<br><b>ICD-10:</b> I85.0, I85.9, I86.4, I98.2, K70.4, K71.1, K72.1, K72.9, K76.5, K76.6, K76.7                                                                                                                             |
| Metastatic solid tumor                                                     | <b>Enhanced ICD-9-CM:</b> 196.x-199.x<br><b>ICD-10:</b> C77.x-C80.x                                                                                                                                                                                                          |
| Organ Transplant                                                           | Identified by National Transplant Services Directory                                                                                                                                                                                                                         |
| AIDS/HIV                                                                   | Identified by HIV Registry                                                                                                                                                                                                                                                   |
| Other immune conditions                                                    | <b>Enhanced ICD-9-CM:</b> 279.x, 288.x, 289.x, 795.7x<br><b>ICD-10:</b> D47.4, D57.x, D68.x, D70.x, D71, D72.x- D76.x, D77, D80.x- D84.x, D89.x, I88.x, M35.9, R75, R76.x                                                                                                    |
| Rheumatologic/Inflammatory                                                 | <b>Enhanced ICD-9-CM:</b> 446.5, 710.0-710.4, 710.8, 714.0-714.2, 714.8<br><b>ICD-10:</b> M05.x, M06.x, M31.5, M32.x-M35.x, M36.0                                                                                                                                            |
| <b>Antibiotic use in the 30 days prior to index date</b>                   | Included mediations from both inpatient and outpatient settings                                                                                                                                                                                                              |
| Aminoglycosides                                                            | Use of Aminoglycosides in the 30 days prior to index date                                                                                                                                                                                                                    |
| Carbapenems                                                                | Use of Carbapenems in the 30 days prior to index date                                                                                                                                                                                                                        |
| 1 <sup>st</sup> generation Cephalosporins                                  | Use of 1 <sup>st</sup> generation Cephalosporins in the 30 days prior to index date                                                                                                                                                                                          |
| 2 <sup>nd</sup> generation Cephalosporins                                  | Use of 2 <sup>nd</sup> generation Cephalosporins in the 30 days prior to index date                                                                                                                                                                                          |
| 3 <sup>rd</sup> generation Cephalosporins                                  | Use of 3 <sup>rd</sup> generation Cephalosporins in the 30 days prior to index date                                                                                                                                                                                          |
| 4 <sup>th</sup> generation Cephalosporins                                  | Use of 4 <sup>th</sup> generation Cephalosporins in the 30 days prior to index date                                                                                                                                                                                          |
| Ceftazidime/Cefepime/Ceftolozane-Tazobactam (combined)                     | Use of Ceftazidime/Cefepime/Ceftolozane-Tazobactam (combined) in the 30 days prior to index date                                                                                                                                                                             |
| Other Cephalosporins*                                                      | Use of Other Cephalosporins in the 30 days prior to index date. Other Cephalosporins include: Cefaclor Cefazolin, Cefixime, Cefotaxime, Cefotetan, Cefoxitin, Cefpodoxime, Ceftriaxone, Cefuroxime and Cephalexin and excludes Ceftazidime, Cefepime, Ceftolozane-Tazobactam |
| Monobactam                                                                 | Use of Monobactam in the 30 days prior to index date                                                                                                                                                                                                                         |

| <b>Covariate</b>               | <b>Definition</b>                                                        |
|--------------------------------|--------------------------------------------------------------------------|
| Glycylcyclines + Tetracyclines | Use of Glycylcyclines + Tetracyclines in the 30 days prior to index date |
| Penicillin                     | Use of Penicillin in the 30 days prior to index date                     |
| Polymyxin + Derivatives        | Use of Polymixin+Derivatives in the 30 days prior to index date          |
| Quinolones                     | Use of Quinolones in the 30 days prior to index date                     |
| Piperacillin-tazobactam        | Use of Piperacillin-tazobactam in the 30 days prior to index date        |

**eTable 2. Comparison of Training and Validation Data Sets for Patients with CR and Non-CR *Pseudomonas aeruginosa* Infections**

|                                                                                         | Training         |                    |             | Validation       |                    |              |
|-----------------------------------------------------------------------------------------|------------------|--------------------|-------------|------------------|--------------------|--------------|
|                                                                                         | CR**<br>(N=1185) | Non-CR<br>(N=4649) | P<br>Value* | CR**<br>(N=1139) | Non-CR<br>(N=4529) | P Value<br>* |
| <b>Demographic</b>                                                                      |                  |                    |             |                  |                    |              |
| Male Sex                                                                                | 680 (57.4%)      | 2626 (56.5%)       | .577        | 701 (61.6%)      | 2547 (56.2%)       | .001         |
| Age at index date in years                                                              |                  |                    | <.001       |                  |                    | <.001        |
| 18-39                                                                                   | 75 (6.3%)        | 231 (5.0%)         |             | 68 (6.0%)        | 293 (6.5%)         |              |
| 40-64                                                                                   | 333 (28.1%)      | 1165 (25.1%)       |             | 354 (31.1%)      | 1127 (24.9%)       |              |
| 65-84                                                                                   | 634 (53.5%)      | 2490 (53.6%)       |             | 602 (52.9%)      | 2411 (53.2%)       |              |
| 85+                                                                                     | 143 (12.1%)      | 763 (16.4%)        |             | 115 (10.1%)      | 698 (15.4%)        |              |
| Race/Ethnicity                                                                          |                  |                    | <.001       |                  |                    | .197         |
| Non-Hispanic White                                                                      | 499 (42.11%)     | 2289 (49.24%)      |             | 544 (47.76%)     | 2211 (48.82%)      |              |
| Asian/Hawaiian/Pacific Islander                                                         | 122 (10.3%)      | 370 (7.96%)        |             | 112 (9.83%)      | 365 (8.06%)        |              |
| Black non-Hispanic                                                                      | 258 (21.77%)     | 754 (16.22%)       |             | 211 (18.53%)     | 780 (17.22%)       |              |
| Hispanic                                                                                | 295 (24.89%)     | 1200 (25.81%)      |             | 262 (23%)        | 1134 (25.04%)      |              |
| American Indian/Alaska Native/Multiple/Other/Unknown                                    | 11 (0.93%)       | 36 (0.77%)         |             | 10 (0.88%)       | 39 (0.86%)         |              |
| <b>Characteristics of Index Admission</b>                                               |                  |                    |             |                  |                    |              |
| Specimen Site of Index Infection                                                        |                  |                    | <.001       |                  |                    | <.001        |
| Other                                                                                   | 440 (37.1%)      | 2744 (59.0%)       |             | 457 (40.1%)      | 2665 (58.8%)       |              |
| Respiratory                                                                             | 745 (62.9%)      | 1905 (41.0%)       |             | 682 (59.9%)      | 1864 (41.2%)       |              |
| Source of Infection                                                                     |                  |                    | <.001       |                  |                    | <.001        |
| Present at hospital admission                                                           | 611 (51.6%)      | 3151 (67.8%)       |             | 663 (58.2%)      | 3095 (68.3%)       |              |
| Hospital-onset                                                                          | 574 (48.4%)      | 1498 (32.2%)       |             | 476 (41.8%)      | 1434 (31.7%)       |              |
| Co-Infecting Pathogen                                                                   | 353 (29.8%)      | 1367 (29.4%)       | .795        | 352 (30.9%)      | 1273 (28.1%)       | .062         |
| ICU Prior to Index Culture                                                              | 500 (42.2%)      | 1125 (24.2%)       | <.001       | 424 (37.2%)      | 1115 (24.6%)       | <.001        |
| Skilled Nurse Facilities Transfer                                                       | 229 (19.3%)      | 326 (7.0%)         | <.001       | 206 (18.1%)      | 243 (5.4%)         | <.001        |
| <b>Invasive Devices and/or Procedures (between admission and prior to culture date)</b> |                  |                    |             |                  |                    |              |
| Endotracheal tube                                                                       | 319 (26.9%)      | 756 (16.3%)        | <.001       | 237 (20.8%)      | 773 (17.1%)        | .003         |
| Tracheostomy                                                                            | 573 (48.4%)      | 544 (11.7%)        | <.001       | 495 (43.5%)      | 530 (11.7%)        | <.001        |
| HemoDialysis                                                                            | 155 (13.1%)      | 203 (4.4%)         | <.001       | 131 (11.5%)      | 181 (4.0%)         | <.001        |
| Gastric or jejunal feeding tube                                                         | 539 (45.5%)      | 875 (18.8%)        | <.001       | 487 (42.8%)      | 791 (17.5%)        | <.001        |
| Indwelling urinary catheter                                                             | 749 (63.2%)      | 1925 (41.4%)       | <.001       | 661 (58.0%)      | 1830 (40.4%)       | <.001        |
| CVC/Port/PICC                                                                           | 453 (38.2%)      | 855 (18.4%)        | <.001       | 363 (31.9%)      | 802 (17.7%)        | <.001        |
| <b>Surgery prior to Index Culture</b>                                                   | 252 (21.3%)      | 609 (13.1%)        | <.001       | 171 (15.0%)      | 583 (12.9%)        | .057         |

|                                                                            | Training         |                    |             | Validation       |                    |              |
|----------------------------------------------------------------------------|------------------|--------------------|-------------|------------------|--------------------|--------------|
|                                                                            | CR**<br>(N=1185) | Non-CR<br>(N=4649) | P<br>Value* | CR**<br>(N=1139) | Non-CR<br>(N=4529) | P Value<br>* |
| <b>LOS from admission to index culture</b>                                 |                  |                    | <.001       |                  |                    | <.001        |
| 0-3                                                                        | 630 (53.2%)      | 3259 (70.1%)       |             | 686 (60.2%)      | 3197 (70.6%)       |              |
| 4-10                                                                       | 172 (14.5%)      | 715 (15.4%)        |             | 164 (14.4%)      | 701 (15.5%)        |              |
| 11+                                                                        | 383 (32.3%)      | 675 (14.5%)        |             | 289 (25.4%)      | 631 (13.9%)        |              |
| <b>Pseudomonas 30 days prior to index admission</b>                        |                  |                    | <.001       |                  |                    | <.001        |
| No Prior Pseudomonas Carbapenem-Susceptible                                | 642 (54.2%)      | 3675 (79.1%)       |             | 652 (57.2%)      | 3653 (80.7%)       |              |
| Pseudomonas Carbapenem-Resistant                                           | 168 (14.2%)      | 882 (19.0%)        |             | 140 (12.3%)      | 811 (17.9%)        |              |
| Pseudomonas                                                                | 375 (31.7%)      | 92 (2.0%)          |             | 347 (30.5%)      | 65 (1.4%)          |              |
| <b>Healthcare Exposure in 6 months Prior to Index Admission</b>            |                  |                    |             |                  |                    |              |
| Previous hospitalization                                                   | 941 (79.4%)      | 2749 (59.1%)       | <.001       | 942 (82.7%)      | 2661 (58.8%)       | <.001        |
| Previous ICU Admission                                                     | 449 (37.9%)      | 824 (17.7%)        | <.001       | 459 (40.3%)      | 776 (17.1%)        | <.001        |
| <b>Comorbidity</b>                                                         |                  |                    |             |                  |                    |              |
| Myocardial infarction                                                      | 258 (21.8%)      | 735 (15.8%)        | <.001       | 197 (17.3%)      | 746 (16.5%)        | .504         |
| Congestive heart failure                                                   | 404 (34.1%)      | 1266 (27.2%)       | <.001       | 435 (38.2%)      | 1291 (28.5%)       | <.001        |
| Peripheral vascular disease                                                | 714 (60.3%)      | 2567 (55.2%)       | .002        | 700 (61.5%)      | 2343 (51.7%)       | <.001        |
| Cerebrovascular disease                                                    | 363 (30.6%)      | 826 (17.8%)        | <.001       | 337 (29.6%)      | 868 (19.2%)        | <.001        |
| Dementia                                                                   | 128 (10.8%)      | 308 (6.6%)         | <.001       | 83 (7.3%)        | 276 (6.1%)         | .140         |
| Chronic pulmonary disease                                                  | 527 (44.5%)      | 1855 (39.9%)       | .004        | 510 (44.8%)      | 1822 (40.2%)       | .005         |
| Peptic ulcer disease                                                       | 50 (4.2%)        | 131 (2.8%)         | .013        | 56 (4.9%)        | 99 (2.2%)          | <.001        |
| Mild liver disease                                                         | 120 (10.1%)      | 366 (7.9%)         | .012        | 139 (12.2%)      | 365 (8.1%)         | <.001        |
| Diabetes                                                                   | 546 (46.1%)      | 1883 (40.5%)       | .001        | 568 (49.9%)      | 1885 (41.6%)       | <.001        |
| Hemiplegia or paraplegia                                                   | 181 (15.3%)      | 393 (8.5%)         | <.001       | 161 (14.1%)      | 371 (8.2%)         | <.001        |
| Malignancy, including leukemia and lymphoma (≠ malignant neoplasm of skin) | 164 (13.8%)      | 834 (17.9%)        | .001        | 231 (20.3%)      | 841 (18.6%)        | .187         |
| Moderate or severe liver disease                                           | 19 (1.6%)        | 57 (1.2%)          | .307        | 36 (3.2%)        | 57 (1.3%)          | <.001        |
| Metastatic solid tumor                                                     | 51 (4.3%)        | 257 (5.5%)         | .093        | 58 (5.1%)        | 295 (6.5%)         | .076         |
| Organ Transplant                                                           | 47 (4.0%)        | 119 (2.6%)         | .009        | 31 (2.7%)        | 107 (2.4%)         | .482         |
| <b>Antibiotic use in 30 days prior to index date</b>                       |                  |                    |             |                  |                    |              |
| Aminoglycosides                                                            | 75 (6.3%)        | 126 (2.7%)         | <.001       | 72 (6.3%)        | 119 (2.6%)         | <.001        |
| Carbapenems                                                                | 291 (24.6%)      | 186 (4.0%)         | <.001       | 251 (22.0%)      | 156 (3.4%)         | <.001        |
| Ceftazidime/Cefepime/Ceftolozane-Tazobactam (combined)                     | 400 (33.8%)      | 867 (18.6%)        | <.001       | 201 (36.9%)      | 1066 (20.2%)       | <.001        |
| Other Cephalosporins***                                                    | 320 (27.0%)      | 2076 (44.7%)       | <.001       | 129 (23.7%)      | 2267 (42.9%)       | <.001        |
| Monobactam                                                                 | 26 (2.2%)        | 44 (1.0%)          | <.001       | 27 (2.4%)        | 41 (0.9%)          | <.001        |
| Glycylcyclines + Tetracyclines                                             | 55 (4.6%)        | 396 (8.5%)         | <.001       | 52 (4.6%)        | 398 (8.8%)         | <.001        |
| Penicillin                                                                 | 428 (36.1%)      | 1505 (32.4%)       | .015        | 436 (38.3%)      | 1330 (29.4%)       | <.001        |
| Quinolones                                                                 | 418 (35.3%)      | 926 (19.9%)        | <.001       | 383 (33.6%)      | 881 (19.5%)        | <.001        |
| Piperacillin-tazobactam                                                    | 367 (31.0%)      | 1181 (25.4%)       | <.001       | 379 (33.3%)      | 1055 (23.3%)       | <.001        |

|                         | Training         |                    |             | Validation       |                    | P Value<br>* |
|-------------------------|------------------|--------------------|-------------|------------------|--------------------|--------------|
|                         | CR**<br>(N=1185) | Non-CR<br>(N=4649) | P<br>Value* | CR**<br>(N=1139) | Non-CR<br>(N=4529) |              |
| <b>Medical Facility</b> |                  |                    | <.001       |                  |                    | <.001        |
| A                       | 84 (7.09%)       | 311 (6.69%)        |             | 48 (4.21%)       | 286 (6.31%)        |              |
| B                       | 85 (7.17%)       | 375 (8.07%)        |             | 86 (7.55%)       | 354 (7.82%)        |              |
|                         | 119<br>(10.04%)  | 421 (9.06%)        |             | 96 (8.43%)       | 502<br>(11.08%)    |              |
| C                       | 137<br>(11.56%)  | 600<br>(12.91%)    |             | 148 (12.99%)     | 539 (11.9%)        |              |
| D                       | 63 (5.32%)       | 274 (5.89%)        |             | 64 (5.62%)       | 262 (5.78%)        |              |
| E                       | 84 (7.09%)       | 302 (6.5%)         |             | 73 (6.41%)       | 221 (4.88%)        |              |
| F                       | 66 (5.57%)       | 245 (5.27%)        |             | 101 (8.87%)      | 237 (5.23%)        |              |
| G                       | 72 (6.08%)       | 197 (4.24%)        |             | 65 (5.71%)       | 208 (4.59%)        |              |
| H                       | 67 (5.65%)       | 301 (6.47%)        |             | 73 (6.41%)       | 327 (7.22%)        |              |
|                         |                  | 573<br>(12.33%)    |             | 94 (8.25%)       | 566 (12.5%)        |              |
| I                       | 100 (8.44%)      | 399 (8.58%)        |             | 68 (5.97%)       | 403 (8.9%)         |              |
| J                       | 76 (6.41%)       | 136<br>(11.48%)    |             | 112 (9.83%)      | 306 (6.76%)        |              |
| K                       | 96 (8.1%)        | 302 (6.5%)         |             | 111 (9.75%)      | 318 (7.02%)        |              |
| L                       |                  |                    |             |                  |                    |              |
| M                       |                  |                    |             |                  |                    |              |

\*Chi-square test and t test used to calculate P-values for categorical and continuous variables, respectively.

\*\*SD = Standard Deviation; CR = Carbapenem non-Susceptible; EBR = Carbapenem&Ceftazidime&Piperacillin-Tazobactam non-susceptible.

\*\*\*Other Cephalosporins include: Cefaclor Cefazolin, Cefixime, Cefotaxime, Cefotetan, Cefoxitin, Cefpodoxime, Ceftriaxone, Cefuroxime and Cephalexin and excludes Ceftazidime, Cefepime, Ceftolozane-Tazobactam



**eTable 3. Comparison of Training and Validation Data Sets for Patients With EBR and Non-EBR *Pseudomonas aeruginosa* Infections**

|                                                                                         | Training         |                     |          | Validation       |                     | P Value* |
|-----------------------------------------------------------------------------------------|------------------|---------------------|----------|------------------|---------------------|----------|
|                                                                                         | EBR**<br>(N=545) | Non-EBR<br>(N=5289) | P Value* | EBR**<br>(N=488) | Non-EBR<br>(N=5180) |          |
| <b>Demographic</b>                                                                      |                  |                     |          |                  |                     |          |
| Male Sex                                                                                | 315 (57.8%)      | 2991 (56.6%)        | .576     | 322 (66.0%)      | 2926 (56.5%)        | <.001    |
| Age at index date in years                                                              |                  |                     | .010     |                  |                     | .024     |
| <65                                                                                     | 195 (35.8%)      | 1609 (30.4%)        |          | 181 (37.1%)      | 1661 (32.1%)        |          |
| >=65                                                                                    | 350 (64.2%)      | 3680 (69.6%)        |          | 307 (62.9%)      | 3519 (67.9%)        |          |
| Race/Ethnicity                                                                          |                  |                     | <.001    |                  |                     | .061     |
| Non-Hispanic White                                                                      | 209 (38.4%)      | 2579 (48.8%)        |          | 220 (45.1%)      | 2535 (48.9%)        |          |
| Asian/Hawaiian/Pacific Islander                                                         | 54 (9.9%)        | 438 (8.3%)          |          | 54 (11.1%)       | 423 (8.2%)          |          |
| Black non-Hispanic                                                                      | 120 (22.0%)      | 892 (16.9%)         |          | 99 (20.3%)       | 892 (17.2%)         |          |
| Hispanic                                                                                | 157 (28.8%)      | 1338 (25.3%)        |          | 111 (22.8%)      | 1285 (24.8%)        |          |
| American Indian/Alaska Native/Multiple/Other/Unknown                                    | 5 (0.9%)         | 42 (0.8%)           |          | 4 (0.8%)         | 45 (0.9%)           |          |
| <b>Characteristics of Index Admission</b>                                               |                  |                     |          |                  |                     |          |
| Specimen Site of Index Infection                                                        |                  |                     | <.001    |                  |                     | <.001    |
| Other                                                                                   | 171 (31.4%)      | 3013 (57.0%)        |          | 169 (34.6%)      | 2953 (57.0%)        |          |
| Respiratory                                                                             | 374 (68.6%)      | 2276 (43.0%)        |          | 319 (65.4%)      | 2227 (43.0%)        |          |
| Source of Infection                                                                     |                  |                     | <.001    |                  |                     | <.001    |
| Present at hospital admission                                                           | 257 (47.2%)      | 3505 (66.3%)        |          | 245 (50.2%)      | 3513 (67.8%)        |          |
| Hospital-onset                                                                          | 288 (52.8%)      | 1784 (33.7%)        |          | 243 (49.8%)      | 1667 (32.2%)        |          |
| Co-infecting Pathogen                                                                   | 166 (30.5%)      | 1554 (29.4%)        | .600     | 155 (31.8%)      | 1470 (28.4%)        | .114     |
| ICU Prior to Index Culture                                                              | 261 (47.9%)      | 1364 (25.8%)        | <.001    | 200 (41.0%)      | 1339 (25.9%)        | <.001    |
| Skilled Nurse Facilities Transfer                                                       | 134 (24.6%)      | 421 (8.0%)          | <.001    | 97 (19.9%)       | 352 (6.8%)          | <.001    |
| <b>Invasive Devices and/or Procedures (between admission and prior to culture date)</b> |                  |                     |          |                  |                     |          |
| Endotracheal tube                                                                       | 151 (27.7%)      | 924 (17.5%)         | <.001    | 105 (21.5%)      | 905 (17.5%)         | .026     |
| Tracheostomy                                                                            | 320 (58.7%)      | 797 (15.1%)         | <.001    | 262 (53.7%)      | 763 (14.7%)         | <.001    |
| HemoDialysis                                                                            | 93 (17.1%)       | 265 (5.0%)          | <.001    | 67 (13.7%)       | 245 (4.7%)          | <.001    |
| Gastric or jejunal feeding tube                                                         | 272 (49.9%)      | 1142 (21.6%)        | <.001    | 257 (52.7%)      | 1021 (19.7%)        | <.001    |
| Indwelling urinary catheter                                                             | 371 (68.1%)      | 2303 (43.5%)        | <.001    | 317 (65.0%)      | 2174 (42.0%)        | <.001    |
| CVC/Port/PICC                                                                           | 253 (46.4%)      | 1055 (20.0%)        | <.001    | 178 (36.5%)      | 987 (19.1%)         | <.001    |
| <b>Surgery prior to Index Culture</b>                                                   | 129 (23.7%)      | 732 (13.8%)         | <.001    | 80 (16.4%)       | 674 (13.0%)         | .036     |
| <b>LOS from admission to index culture</b>                                              |                  |                     | <.001    |                  |                     | <.001    |
| 0-3                                                                                     | 263 (48.3%)      | 3626 (68.6%)        |          | 256 (52.5%)      | 3627 (70.0%)        |          |
| 4-10                                                                                    | 73 (13.4%)       | 814 (15.4%)         |          | 81 (16.6%)       | 784 (15.1%)         |          |
| 11+                                                                                     | 209 (38.4%)      | 849 (16.1%)         |          | 151 (30.9%)      | 769 (14.9%)         |          |
| <b><i>Pseudomonas</i> 30 days prior to index admission</b>                              |                  |                     |          |                  |                     |          |
| No Prior <i>Pseudomonas</i>                                                             | 236 (43.3%)      | 4081 (77.2%)        | <.001    | 228 (46.7%)      | 4077 (78.7%)        | <.001    |
| Carbapenem-Susceptible <i>Pseudomonas</i>                                               | 90 (16.5%)       | 960 (18.2%)         |          | 65 (13.3%)       | 886 (17.1%)         |          |
| Carbapenem-Resistant <i>Pseudomonas</i>                                                 | 219 (40.2%)      | 248 (4.7%)          |          | 195 (40.0%)      | 217 (4.2%)          |          |
| <b>Healthcare Exposure in 6 months Prior to Index Admission</b>                         |                  |                     |          |                  |                     |          |
| Previous hospitalization                                                                | 459 (84.2%)      | 3231 (61.1%)        | <.001    | 410 (84.0%)      | 3193 (61.6%)        | <.001    |
| Previous ICU Admission                                                                  | 235 (43.1%)      | 1038 (19.6%)        | <.001    | 226 (46.3%)      | 1009 (19.5%)        | <.001    |
| <b>Comorbidity</b>                                                                      |                  |                     |          |                  |                     |          |
| Myocardial infarction                                                                   | 136 (25.0%)      | 857 (16.2%)         | <.001    | 88 (18.0%)       | 855 (16.5%)         | .387     |
| Congestive heart failure                                                                | 210 (38.5%)      | 1460 (27.6%)        | <.001    | 203 (41.6%)      | 1523 (29.4%)        | <.001    |
| Peripheral vascular disease                                                             | 329 (60.4%)      | 2952 (55.8%)        | .041     | 297 (60.9%)      | 2746 (53.0%)        | .001     |
| Cerebrovascular disease                                                                 | 179 (32.8%)      | 1010 (19.1%)        | <.001    | 148 (30.3%)      | 1057 (20.4%)        | <.001    |
| Dementia                                                                                | 63 (11.6%)       | 373 (7.1%)          | .000     | 35 (7.2%)        | 324 (6.3%)          | .426     |
| Chronic pulmonary disease                                                               | 235 (43.1%)      | 2147 (40.6%)        | .253     | 239 (49.0%)      | 2093 (40.4%)        | <.001    |

|                                                                            | Training         |                     |       | Validation       |                     | P Value* |
|----------------------------------------------------------------------------|------------------|---------------------|-------|------------------|---------------------|----------|
|                                                                            | EBR**<br>(N=545) | Non-EBR<br>(N=5289) |       | EBR**<br>(N=488) | Non-EBR<br>(N=5180) |          |
| Peptic ulcer disease                                                       | 27 (5.0%)        | 154 (2.9%)          | .009  | 28 (5.7%)        | 127 (2.5%)          | <.001    |
| Mild liver disease                                                         | 63 (11.6%)       | 423 (8.0%)          | .004  | 64 (13.1%)       | 440 (8.5%)          | .001     |
| Diabetes                                                                   | 260 (47.7%)      | 2169 (41.0%)        | .003  | 256 (52.5%)      | 2197 (42.4%)        | <.001    |
| Hemiplegia or paraplegia                                                   | 83 (15.2%)       | 491 (9.3%)          | <.001 | 83 (17.0%)       | 449 (8.7%)          | <.001    |
| Malignancy, including leukemia and lymphoma (≠ malignant neoplasm of skin) | 71 (13.0%)       | 927 (17.5%)         | .008  | 98 (20.1%)       | 974 (18.8%)         | .490     |
| AIDS/HIV                                                                   | 2 (0.4%)         | 25 (0.5%)           | .729  | 0 (0.0%)         | 39 (0.8%)           | .054     |
| <b>Antibiotic use in 30 days prior to index date</b>                       |                  |                     |       |                  |                     |          |
| Aminoglycosides                                                            | 43 (7.9%)        | 158 (3.0%)          | <.001 | 36 (7.4%)        | 155 (3.0%)          | <.001    |
| Carbapenems                                                                | 156 (28.6%)      | 321 (6.1%)          | <.001 | 121 (24.8%)      | 286 (5.5%)          | <.001    |
| Ceftazidime/Cefepime/Ceftolozane-Tazobactam (combined)                     | 201 (36.9%)      | 1066 (20.2%)        | <.001 | 201 (36.9%)      | 1066 (20.2%)        | <.001    |
| Other Cephalosporins***                                                    | 129 (23.7%)      | 2267 (42.9%)        | <.001 | 129 (23.7%)      | 2267 (42.9%)        | <.001    |
| Monobactam                                                                 | 13 (2.4%)        | 57 (1.1%)           | .008  | 18 (3.7%)        | 50 (1.0%)           | <.001    |
| Glycylcyclines + Tetracyclines                                             | 18 (3.3%)        | 433 (8.2%)          | <.001 | 23 (4.7%)        | 427 (8.2%)          | .006     |
| Penicillin                                                                 | 206 (37.8%)      | 1727 (32.7%)        | .015  | 212 (43.4%)      | 1554 (30.0%)        | <.001    |
| Quinolones                                                                 | 196 (36.0%)      | 1148 (21.7%)        | <.001 | 157 (32.2%)      | 1107 (21.4%)        | <.001    |
| Piperacillin-tazobactam                                                    | 180 (33.0%)      | 1368 (25.9%)        | <.001 | 194 (39.8%)      | 1240 (23.9%)        | <.001    |
| <b>Medical Facility</b>                                                    |                  |                     | <.001 |                  |                     | <.001    |
| A                                                                          | 41 (7.52%)       | 354 (6.69%)         |       | 16 (3.28%)       | 318 (6.14%)         |          |
| B                                                                          | 39 (7.16%)       | 421 (7.96%)         |       | 30 (6.15%)       | 410 (7.92%)         |          |
| C                                                                          | 44 (8.07%)       | 496 (9.38%)         |       | 32 (6.56%)       | 566 (10.93%)        |          |
| D                                                                          | 59 (10.83%)      | 678 (12.82%)        |       | 62 (12.7%)       | 625 (12.07%)        |          |
| E                                                                          | 26 (4.77%)       | 311 (5.88%)         |       | 29 (5.94%)       | 297 (5.73%)         |          |
| F                                                                          | 33 (6.06%)       | 353 (6.67%)         |       | 30 (6.15%)       | 264 (5.1%)          |          |
| G                                                                          | 37 (6.79%)       | 274 (5.18%)         |       | 49 (10.04%)      | 289 (5.58%)         |          |
| H                                                                          | 39 (7.16%)       | 230 (4.35%)         |       | 29 (5.94%)       | 244 (4.71%)         |          |
| I                                                                          | 36 (6.61%)       | 332 (6.28%)         |       | 28 (5.74%)       | 372 (7.18%)         |          |
| J                                                                          | 48 (8.81%)       | 625 (11.82%)        |       | 37 (7.58%)       | 623 (12.03%)        |          |
| K                                                                          | 29 (5.32%)       | 446 (8.43%)         |       | 27 (5.53%)       | 444 (8.57%)         |          |
| L                                                                          | 75 (13.76%)      | 410 (7.75%)         |       | 68 (13.93%)      | 350 (6.76%)         |          |
| M                                                                          | 39 (7.16%)       | 359 (6.79%)         |       | 51 (10.45%)      | 378 (7.3%)          |          |

\*Chi-square test and t test used to calculate P-values for categorical and continuous variables, respectively.

\*\*SD = Standard Deviation; CR = Carbapenem non-Susceptible; EBR = Carbapenem&Ceftazidime&Piperacillin-Tazobactam non-susceptible.

\*\*\*Other Cephalosporins include: Cefaclor Cefazolin, Cefixime, Cefotaxime, Cefotetan, Cefoxitin, Cefpodoxime, Ceftriaxone, Cefuroxime and Cephalexin and excludes Ceftazidime, Cefepime, Ceftolozane-Tazobactam

**eFigure 1. Comparison of Model Performance by Variable Selection Approach: Traditional Logistic Regression, LASSO, and Schwarz-Bayesian Criterion (SBC)**

**a.) Carbapenem non-susceptible Pseudomonas (training dataset, n=5834)**

| ROC Model                    | ROC Association Statistics |                |                            |           |        |        |
|------------------------------|----------------------------|----------------|----------------------------|-----------|--------|--------|
|                              | Mann-Whitney               |                |                            | Somers' D | Gamma  | Tau-a  |
|                              | C-statistic                | Standard Error | 95% Wald Confidence Limits |           |        |        |
| Standard logistic regression | 0.8161                     | 0.0075         | 0.8014 0.8308              | 0.6322    | 0.638  | 0.2047 |
| LASSO                        | 0.8132                     | 0.00757        | 0.7983 0.828               | 0.6263    | 0.6289 | 0.2028 |
| Schwarz-Bayesian Criterion   | 0.8072                     | 0.00771        | 0.7921 0.8223              | 0.6143    | 0.6484 | 0.1989 |

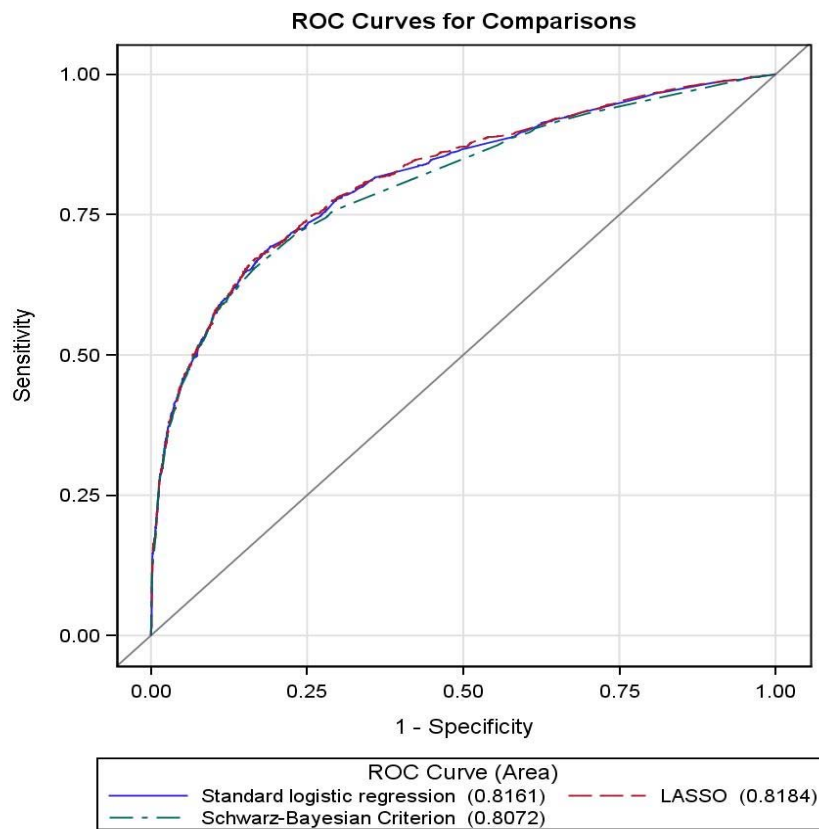

| Model Covariates                                                                                                                                                                                                                                                                                                                  |
|-----------------------------------------------------------------------------------------------------------------------------------------------------------------------------------------------------------------------------------------------------------------------------------------------------------------------------------|
| <b>Standard logistic regression:</b> Skilled nurse facility transfer, invasive device (tracheostomy, CVC/Port/PICC), previous Pseudomonas, previous hospitalization, comorbidities (cerebrovascular disease, dementia, hemiplegia or paraplegia, malignancy), carbapenems, other cephalosporins, quinolones.                      |
| <b>LASSO:</b> specimen, skilled nurse facility transfer, invasive device (tracheostomy, tube, UA, CVC/Port/PICC), previous Pseudomonas, previous hospitalization, previous ICU Admission, comorbidities (cerebrovascular disease, dementia, hemiplegia or paraplegia, malignancy), carbapenems, other cephalosporins, quinolones. |
| <b>SBC High performance logistic regression:</b> Invasive device (tracheostomy, CVC/Port/PICC), previous Pseudomonas, previous hospitalization, comorbidities (cerebrovascular disease, or malignancy), carbapenems, quinolones.                                                                                                  |

a.) Carbapenem & ceftazidime & piperacillin-tazobactam non-susceptible *Pseudomonas* (training dataset, n=5834)

| ROC Model                    | ROC Association Statistics |                |                            |           |        |        |
|------------------------------|----------------------------|----------------|----------------------------|-----------|--------|--------|
|                              | Mann-Whitney               |                |                            | Somers' D | Gamma  | Tau-a  |
|                              | C-statistic                | Standard Error | 95% Wald Confidence Limits |           |        |        |
| Standard logistic regression | 0.8409                     | 0.00945        | 0.8224 0.8595              | 0.6819    | 0.6842 | 0.1155 |
| LASSO                        | 0.8419                     | 0.00928        | 0.8237 0.8601              | 0.6839    | 0.687  | 0.1159 |
| Schwarz-Bayesian Criterion   | 0.8367                     | 0.00941        | 0.8183 0.8552              | 0.6734    | 0.708  | 0.1141 |

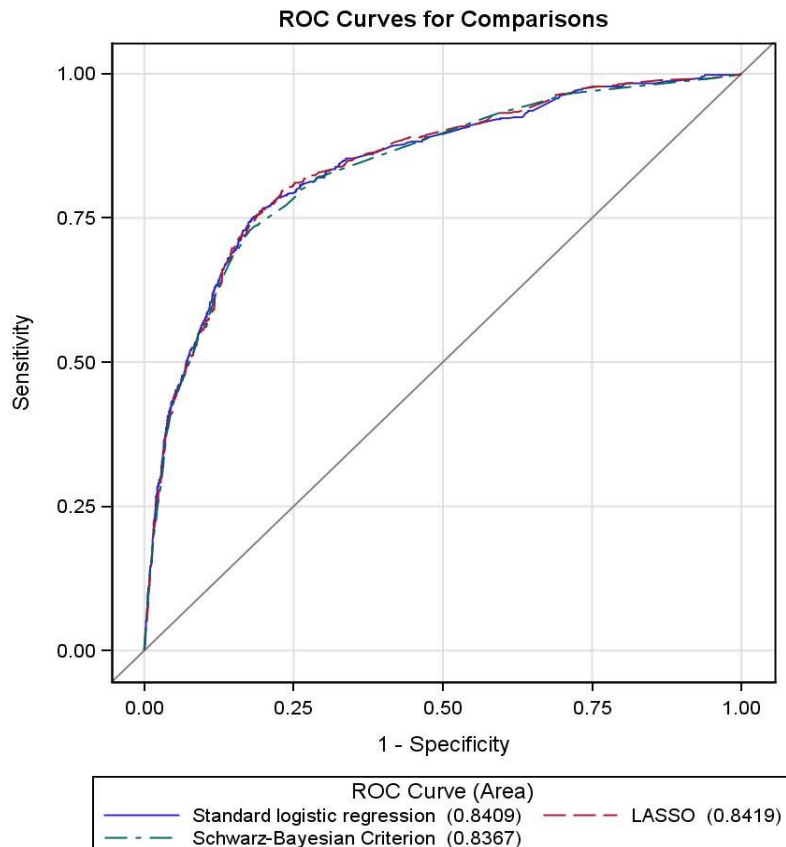

**Model Covariates**

**Standard logistic regression:** Age 65+ at index date in years, specimen, skilled nurse facility transfer, invasive device (tracheostomy, hemodialysis, tube, CVC/Port/PICC), previous *Pseudomonas*, previous hospitalization, MI, dementia, carbapenems, other cephalosporins,

**LASSO:** specimen, skilled nurse facility transfer, invasive device (tracheostomy, CVC/Port/PICC), previous *Pseudomonas*, previous hospitalization, comorbidities (myocardial infarction, cerebrovascular disease), carbapenems, other cephalosporins, quinolones.

**SBC High performance logistic regression:** Skilled nurse facility transfer, invasive device (tracheostomy, CVC/Port/PICC), previous *Pseudomonas*, previous hospitalization, carbapenems

**eTable 4. Selected Characteristics of Patients With CR, Non-CR, EBR, and Non-EBR *Pseudomonas aeruginosa* Infections**

|                                                                       | Total Patients<br>(n=7775) | CR**<br>(n=963) | Non-CR**<br>(n=6812) | P<br>Value* | EBR<br>(n=325) | Non-EBR<br>(n=7450) | P Value* |
|-----------------------------------------------------------------------|----------------------------|-----------------|----------------------|-------------|----------------|---------------------|----------|
| <b>Sex</b>                                                            |                            |                 |                      | .977        |                |                     | .8128    |
| Female                                                                | 3467 (44.59%)              | 429 (44.55%)    | 3038 (44.6%)         |             | 147 (45.23%)   | 3320 (44.56%)       |          |
| Male                                                                  | 4308 (55.41%)              | 534 (55.45%)    | 3774 (55.4%)         |             | 178 (54.77%)   | 4130 (55.44%)       |          |
| <b>Age at index date in years</b>                                     |                            |                 |                      | .001        |                |                     | .2288    |
| Mean (SD)                                                             | 70.3 (15.49)               | 68.9 (15.37)    | 70.5 (15.50)         |             | 69.4 (15.13)   | 70.3 (15.51)        |          |
| Median                                                                | 73                         | 71              | 73                   |             | 72             | 73                  |          |
| Q1, Q3                                                                | 62.0, 81.0                 | 61.0, 80.0      | 62.0, 82.0           |             | 62.0, 80.0     | 62.0, 81.0          |          |
| Range                                                                 | (18.0-107.0)               | (18.0-97.0)     | (18.0-107.0)         |             | (18.0-96.0)    | (18.0-107.0)        |          |
| <b>Age at index date in years</b>                                     |                            |                 |                      | .018        |                |                     | .5742    |
| 18-39                                                                 | 383 (4.93%)                | 48 (4.98%)      | 335 (4.92%)          |             | 14 (4.31%)     | 369 (4.95%)         |          |
| 40-64                                                                 | 1936 (24.9%)               | 268 (27.83%)    | 1668 (24.49%)        |             | 84 (25.85%)    | 1852 (24.86%)       |          |
| 65-84                                                                 | 4159 (53.49%)              | 516 (53.58%)    | 3643 (53.48%)        |             | 181 (55.69%)   | 3978 (53.4%)        |          |
| 85+                                                                   | 1297 (16.68%)              | 131 (13.6%)     | 1166 (17.12%)        |             | 46 (14.15%)    | 1251 (16.79%)       |          |
| <b>Race/Ethnicity</b>                                                 |                            |                 |                      | .001        |                |                     | .0001    |
| Non-Hispanic White                                                    | 3927 (50.51%)              | 441 (45.79%)    | 3486 (51.17%)        |             | 132 (40.62%)   | 3795 (50.94%)       |          |
| Asian/Hawaiian/Pacific Islander                                       | 577 (7.42%)                | 81 (8.41%)      | 496 (7.28%)          |             | 29 (8.92%)     | 548 (7.36%)         |          |
| Black non-Hispanic                                                    | 1246 (16.03%)              | 197 (20.46%)    | 1049 (15.4%)         |             | 81 (24.92%)    | 1165 (15.64%)       |          |
| Hispanic                                                              | 1968 (25.31%)              | 237 (24.61%)    | 1731 (25.41%)        |             | 80 (24.62%)    | 1888 (25.34%)       |          |
| American Indian/Alaska<br>Native/Multiple/Other <sup>‡</sup> /Unknown | 57 (0.73%)                 | 7 (0.73%)       | 50 (0.73%)           |             | 3 (0.92%)      | 54 (0.72%)          |          |
| <b>Charlson Comorbidity Score</b>                                     |                            |                 |                      | <.001       |                |                     | <.0001   |
| 0                                                                     | 879 (11.31%)               | 67 (6.96%)      | 812 (11.92%)         |             | 19 (5.85%)     | 860 (11.54%)        |          |
| 1                                                                     | 1004 (12.91%)              | 101 (10.49%)    | 903 (13.26%)         |             | 24 (7.38%)     | 980 (13.15%)        |          |
| 2                                                                     | 1316 (16.93%)              | 152 (15.78%)    | 1164 (17.09%)        |             | 51 (15.69%)    | 1265 (16.98%)       |          |
| ≥3                                                                    | 4576 (58.86%)              | 643 (66.77%)    | 3933 (57.74%)        |             | 231 (71.08%)   | 4345 (58.32%)       |          |

\*Chi-square test and t test used to calculate P-values for categorical and continuous variables, respectively.

\*\*SD = Standard Deviation; CR = Carbapenem non-Susceptible; EBR = Carbapenem&Ceftazidime&Piperacillin-Tazobactam non-susceptible.

<sup>‡</sup>'Other' race was defined by self-report of 'other', or Bahamian, Guatemalan, Honduran, Mestizo, Nicaraguan, or Panamanian; Mild liver disease includes ICD-9/10 codes for alcoholic cirrhosis, cirrhosis without mention of alcohol, biliary cirrhosis, chronic hepatitis; moderate or severe liver disease includes ICD-9/10 codes for hepatic coma, portal hypertension, other sequelae of chronic liver disease, and esophageal varices

**eTable 5. Antibiotic Susceptibility Results, Stratified by CR and EBR Status**

| Antibiotic              | Overall Tested<br>(N=11502) | Overall<br>Non-Susceptible | NON-CR<br>(N=9178) | CR<br>(N=2324)  | NON-EBR<br>(N=10469) | EBR<br>(N=1033) |
|-------------------------|-----------------------------|----------------------------|--------------------|-----------------|----------------------|-----------------|
|                         |                             |                            | Non-susceptible    | Non-susceptible | Non-susceptible      | Non-susceptible |
| Amikacin <sup>†</sup>   | 1963                        | 572 (29.1)                 | 296 (3.2)          | 276 (11.9)      | 395 (3.8)            | 177 (17.1)      |
| Aztreonam               | 11492                       | 3497 (30.4)                | 1987 (21.6)        | 1510 (65.0)     | 2568 (24.5)          | 929 (89.9)      |
| Ceftazidime             | 11500                       | 2191 (19.1)                | 1076 (11.7)        | 1115 (48.0)     | 1158 (11.1)          | 1033 (100.0)    |
| Ciprofloxacin           | 11495                       | 2910 (25.3)                | 1396 (15.2)        | 1514 (65.1)     | 2117 (20.2)          | 793 (76.8)      |
| Gentamicin              | 11502                       | 2009 (17.5)                | 1050 (11.4)        | 959 (41.3)      | 1460 (13.9)          | 549 (53.1)      |
| Imipenem                | 11491                       | 2185 (19.0)                | 0 (0.0)            | 2185 (94.0)     | 1185 (11.3)          | 1000 (96.8)     |
| Meropenem               | 11498                       | 1790 (15.6)                | 0 (0.0)            | 1790 (77.0)     | 855 (8.2)            | 935 (90.5)      |
| Piperacillin+Tazobactam | 11500                       | 2230 (19.4)                | 1000 (10.9)        | 1230 (52.9)     | 1197 (11.4)          | 1033 (100.0)    |
| Tobramycin <sup>†</sup> | 1961                        | 681 (34.7)                 | 244 (2.7)          | 437 (18.8)      | 418 (4.0)            | 263 (25.5)      |

All data are presented as number (percent) unless otherwise indicated

\* CR = Carbapenem non-Susceptible; EBR = Carbapenem&Ceftazidime&Piperacillin-Tazobactam non-susceptible.

<sup>†</sup> Amikacin and tobramycin only reported if gentamicin is intermediate or resistant

**eFigure 2. Flowchart of Study Population Selection**

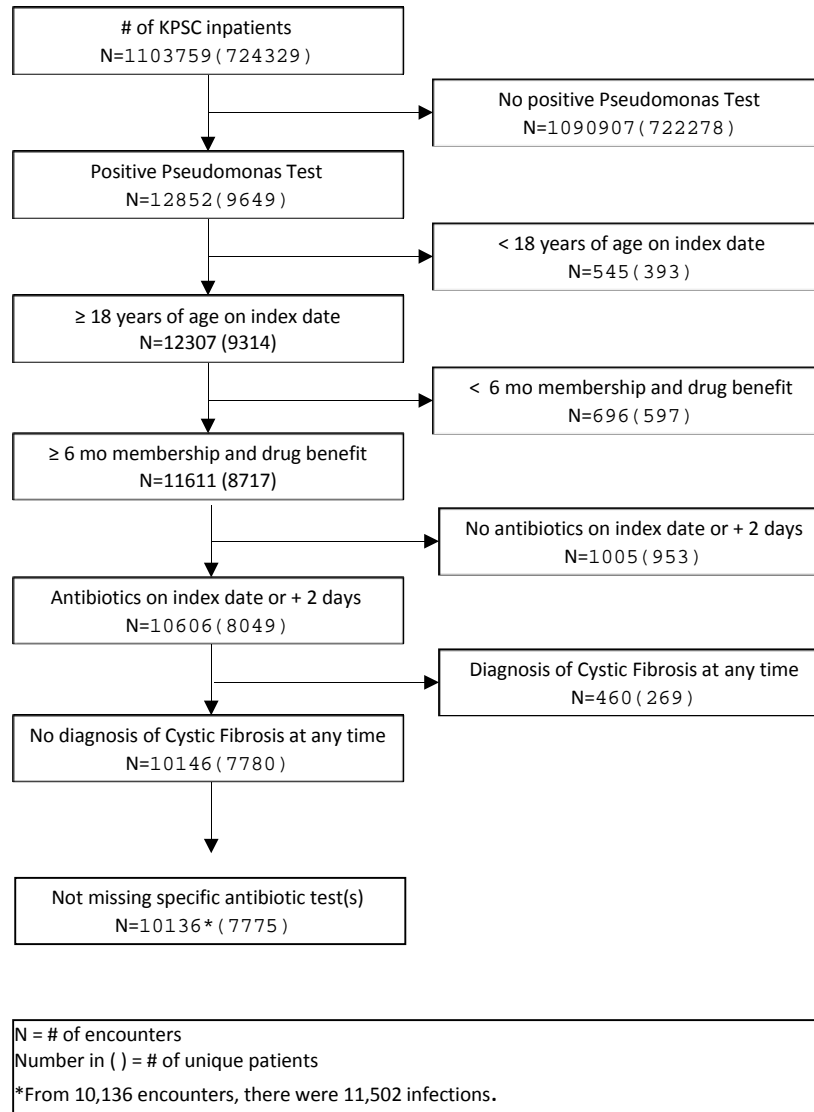

**eFigure 3. Estimated Risk of Carbapenem-Resistant (CR) and Carbapenem, Ceftazidime, and Piperacillin-Tazobactam-Resistant (EBR) *Pseudomonas aeruginosa* Infection by Point Total**

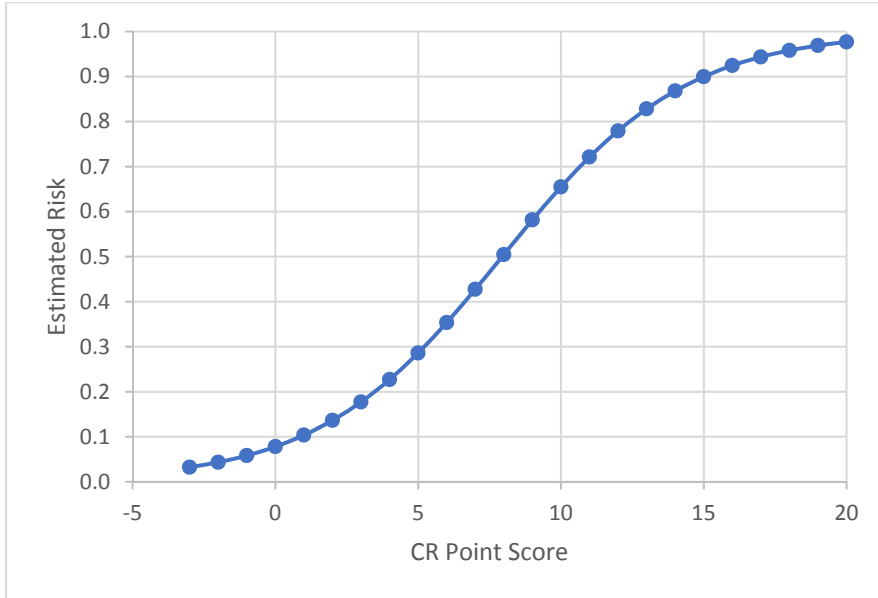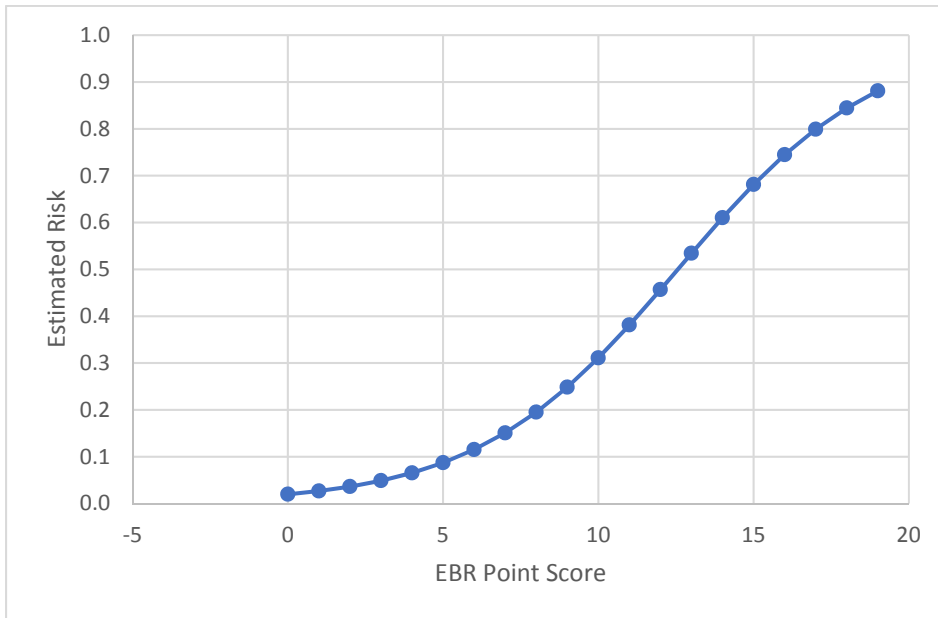



**eTable 6. Comparison of Observed and Point-Based Predicted Risk by Quintile for CR and EBR *Pseudomonas aeruginosa* (n = 5668)**

**a.) Carbapenem Non-Susceptible (CR) *Pseudomonas aeruginosa***

| Estimated Risk Quintile | N    | CR Cases | Observed Risk | Mean Point-Based Estimated Risk | Lower Confidence Interval | Upper Confidence Interval |
|-------------------------|------|----------|---------------|---------------------------------|---------------------------|---------------------------|
| 1                       | 1127 | 57       | 0.051         | 0.054                           | 0.054                     | 0.055                     |
| 2                       | 870  | 65       | 0.075         | 0.074                           | 0.074                     | 0.075                     |
| 3                       | 1794 | 203      | 0.113         | 0.092                           | 0.091                     | 0.093                     |
| 4                       | 747  | 153      | 0.205         | 0.143                           | 0.140                     | 0.145                     |
| 5                       | 1130 | 661      | 0.585         | 0.491                           | 0.477                     | 0.505                     |

**b.) Carbapenem & Ceftazidime & Piperacillin-Tazobactam Non-Susceptible (EBR)**

***Pseudomonas aeruginosa***

| Estimated Risk Quintiles | N    | EBR Cases | Observed Risk | Mean Point-Based Estimated Risk | Lower Confidence Interval | Upper Confidence Interval |
|--------------------------|------|-----------|---------------|---------------------------------|---------------------------|---------------------------|
| 1                        | 1635 | 22        | 0.014         | 0.020                           | 0.020                     | 0.020                     |
| 2                        | 640  | 34        | 0.053         | 0.055                           | 0.054                     | 0.057                     |
| 3                        | 1671 | 62        | 0.037         | 0.049                           | 0.049                     | 0.049                     |
| 4                        | 595  | 53        | 0.089         | 0.112                           | 0.108                     | 0.117                     |
| 5                        | 1127 | 317       | 0.281         | 0.316                           | 0.305                     | 0.328                     |

**eTable 7. Sensitivity Analyses Including only the First Infection per Patient**

**Multivariable final model for carbapenem non-susceptible (CR) *P. aeruginosa* infection derived from training dataset, restricted to first infection (n=3,888)**

|                                                                      | OR (95% CI)*        | P Value |
|----------------------------------------------------------------------|---------------------|---------|
| <b>Skilled Nurse Facilities Transfer</b>                             | 2.20 (1.44- 3.37)   | .021    |
| <b>Tracheostomy (from admission to culture date)</b>                 | 3.33 (2.65- 4.19)   | .002    |
| <b>Pseudomonas 30 days prior to index admission</b>                  |                     | <.0001  |
| No Prior Pseudomonas (ref)                                           |                     |         |
| Carbapenem-Susceptible Pseudomonas                                   | 0.38 (0.24- 0.60)   |         |
| Carbapenem-Resistant Pseudomonas                                     | 11.87 (7.99- 17.61) |         |
| <b>Previous Hospitalization in 6 months Prior to Index Admission</b> | 1.80 (1.51- 2.15)   | <.0001  |
| <b>Carbapenems 30 days prior to index date</b>                       | 4.18 (3.29- 5.31)   | <.0001  |
| <b>Other Cephalosporins 30 days prior to index date</b>              | 0.77 (0.66- 0.91)   | .002    |
| <b>Quinolones</b>                                                    | 1.53 (1.29- 1.81)   | <.0001  |

\* Generalized estimating equation methods were applied to account for within-medical facility correlation.

**Multivariable final model for carbapenem & ceftazidime & piperacillin-tazobactam non-susceptible (EBR) *P. aeruginosa* infection derived from training dataset, restricted to first infection (n=3,888)**

|                                                                      | OR (95% CI)*       | P Value |
|----------------------------------------------------------------------|--------------------|---------|
| <b>Skilled Nurse Facilities Transfer</b>                             | 2.30 (1.33- 3.97)  | .0359   |
| <b>Tracheostomy (from admission to culture date)</b>                 | 3.25 (2.27- 4.65)  | .0034   |
| <b>CVC/Port/PICC (from admission to culture date)</b>                | 1.69 (1.19- 2.40)  | .0215   |
| <b>Pseudomonas 30 days prior to index admission</b>                  |                    | .0559   |
| No Prior Pseudomonas (ref)                                           |                    |         |
| Carbapenem-Susceptible Pseudomonas                                   | 0.76 (0.51- 1.13)  |         |
| Carbapenem-Resistant Pseudomonas                                     | 7.06 (3.91- 12.77) |         |
| <b>Previous Hospitalization in 6 months Prior to Index Admission</b> | 1.69 (1.25- 2.29)  | .0082   |
| <b>Carbapenems 30 days prior to index date</b>                       | 1.87 (1.17- 2.97)  | .0504   |

#### eFigure 4. Models in Training and Validation Data Sets

Carbapenem non-susceptible model in training dataset (1st infection per patient n=3888)

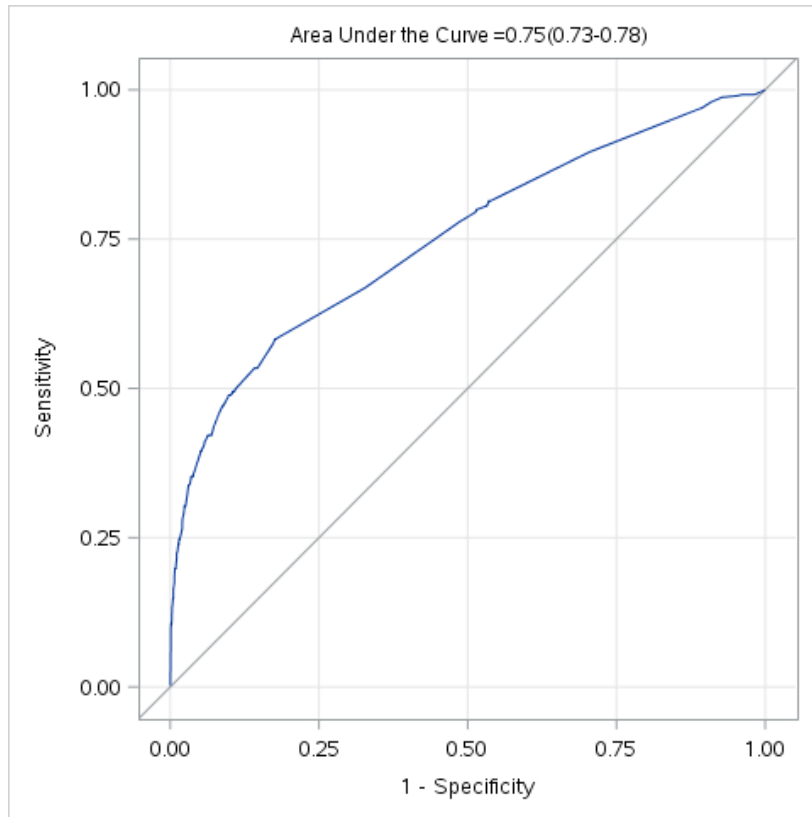

Carbapenem non-susceptible model in validation dataset (1st infection per patient n=3887)

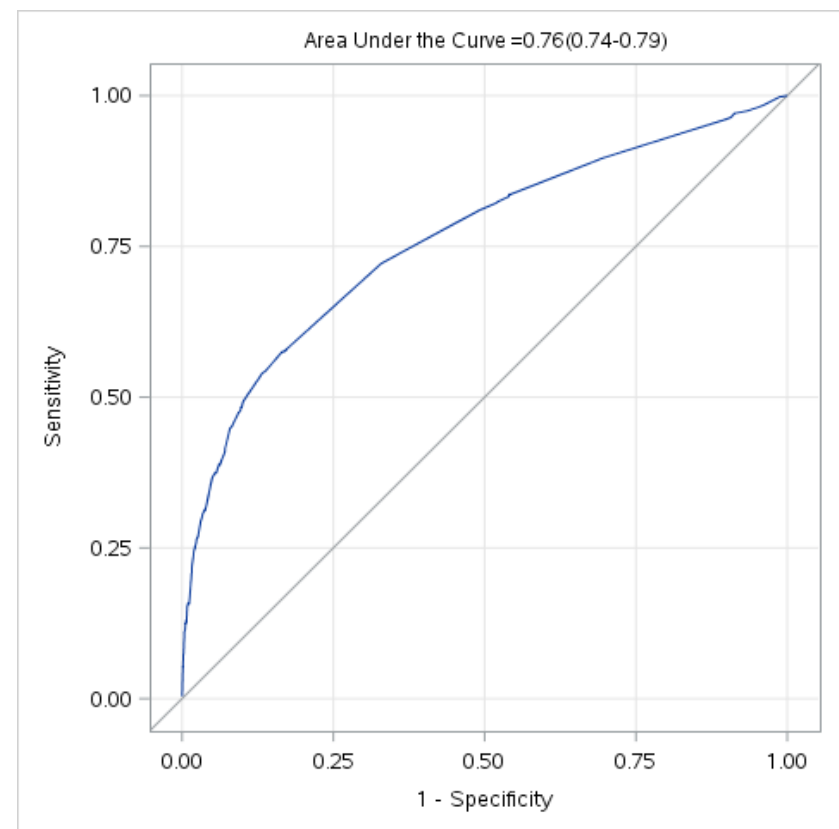

**Extensively beta-lactam non-susceptible model in training dataset (1st infection per patient n=3888)**

---

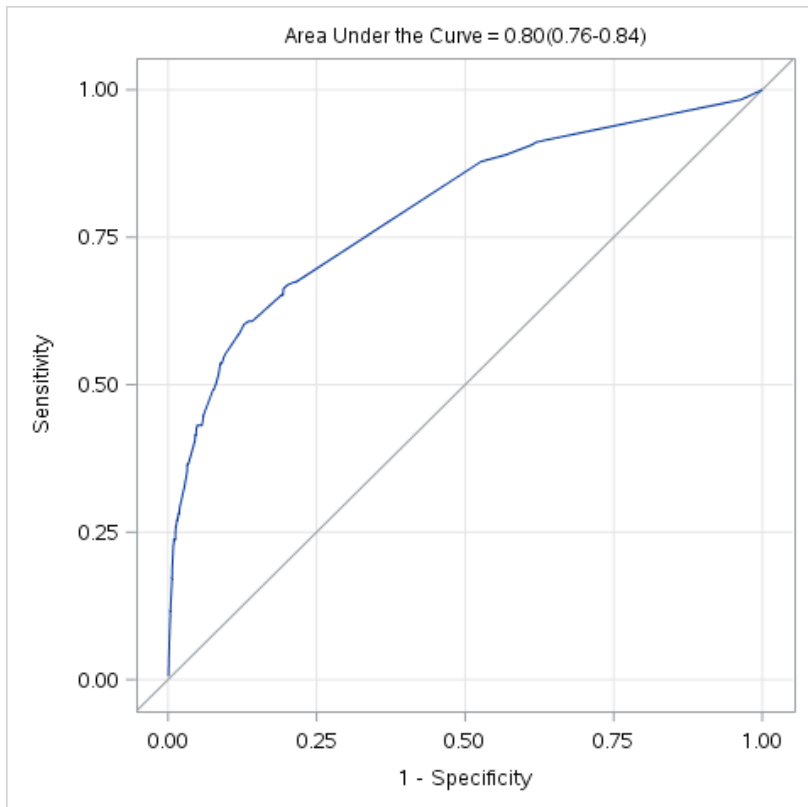

**Extensively beta-lactam non-susceptible model in validation dataset (1st infection per patient n=3887)**

---

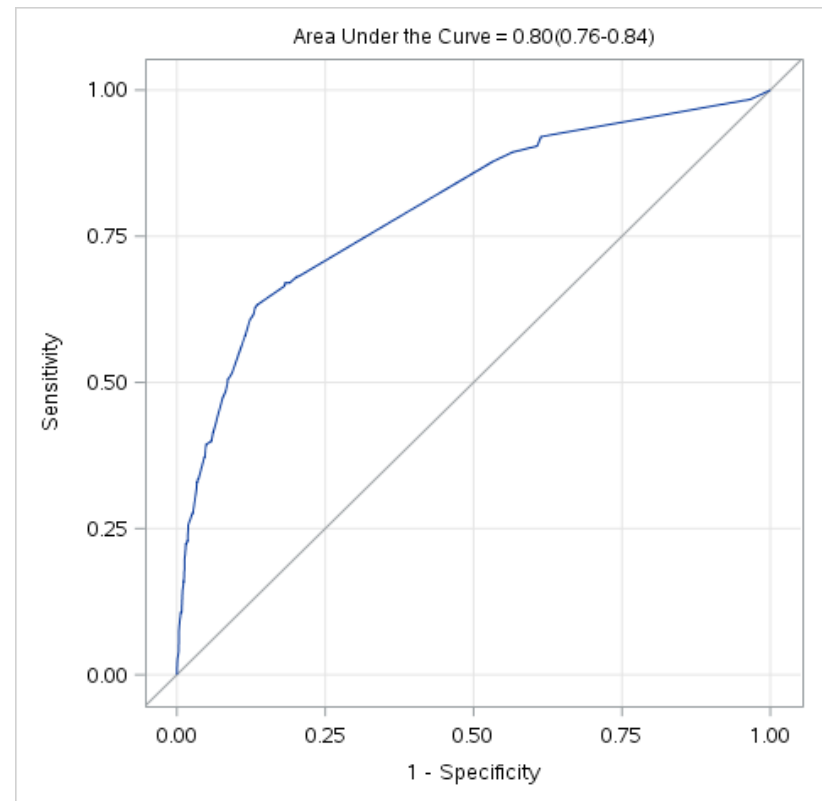

Supplement: jamanetwopen-1-e183927-s001.pdf [file jamanetwopen-1-e183927-s001.pdf]
